# Supplementary material
Source: PubMed Central journal article supplement (PMC6475797)
Supplement: JVI.02309-18-s0001.pdf [file JVI.02309-18-s0001.pdf]

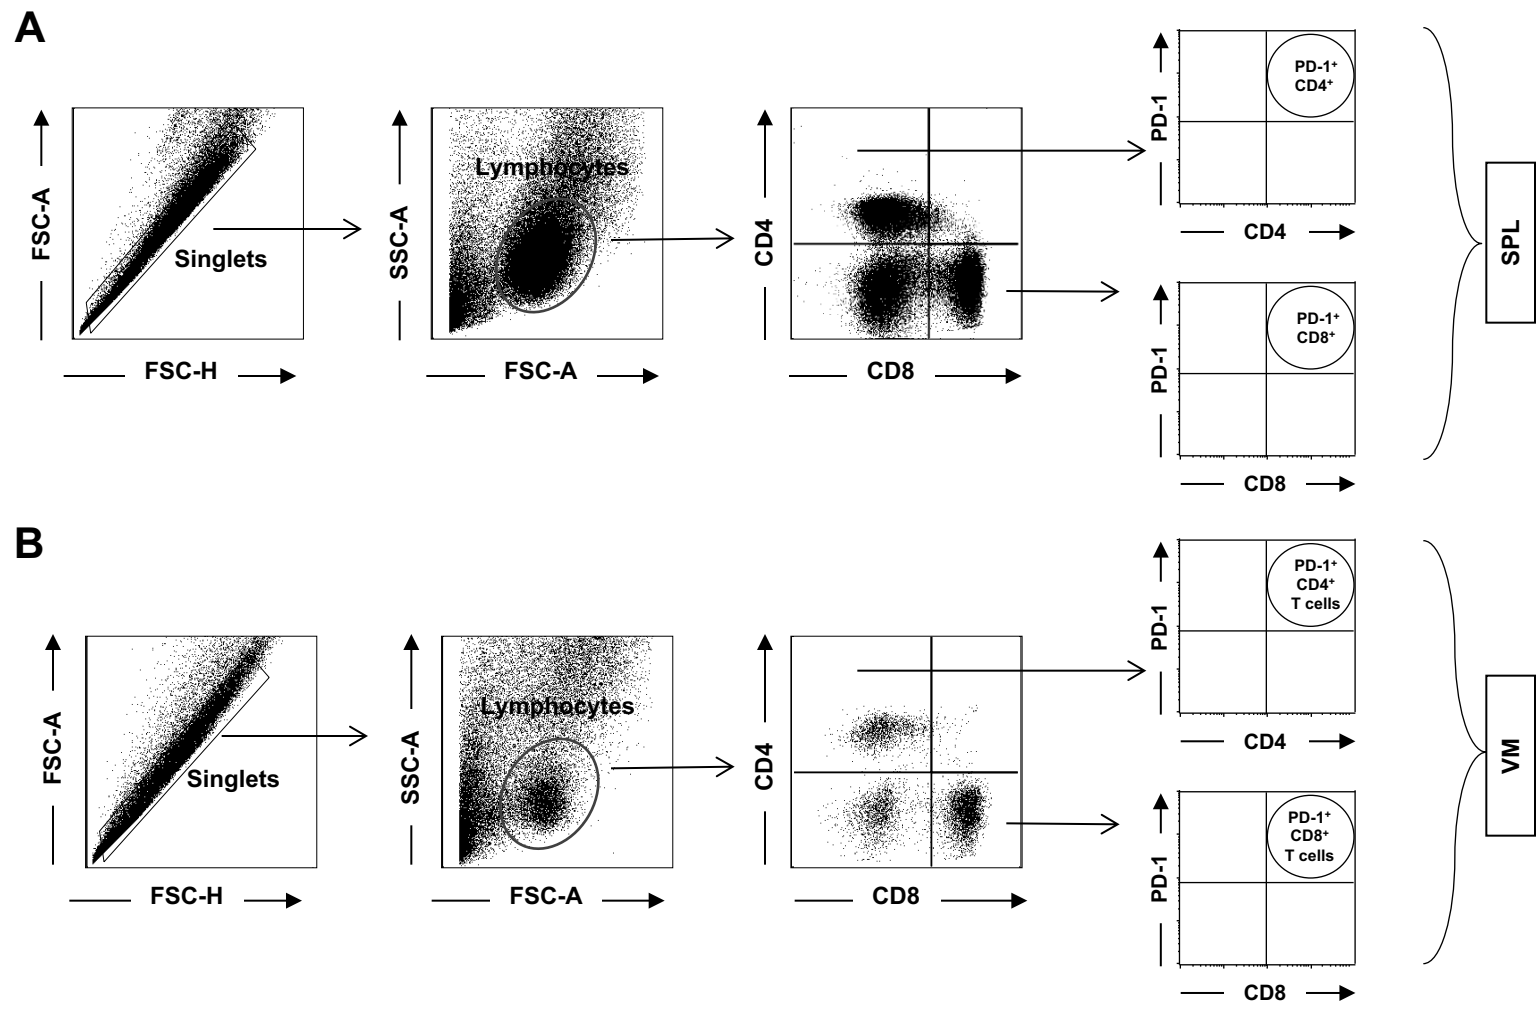

**Figure S1. Flow cytometry gating strategy for guinea pigs PD-1<sup>+</sup>,Tim-3<sup>+</sup> or CRTAM<sup>+</sup>, CD8<sup>+</sup> T cells and CD4<sup>+</sup> T cells:** Spleen (SPL) or vaginal mucosa (VM) were harvested and cell suspension were stained with mAbs specific to PD-1,Tim-3 ,CRTAM, CD8 or CD4 molecules. Singlets were first selected by plotting forward scatter area (FSC-A) versus forward scatter height (FSC-H). Lymphocytes were then identified by a low forward scatter (FSC) and low side scatter (SSC) gate. The CD8 and CD4 positive T cells were then identified and gated based on the expression of CD3, CD8 and CD4. PD-1, Tim-3 or CRTAM expression was then determined on gated CD8<sup>+</sup> T and CD4<sup>+</sup> T cells.
